# Supplementary material for: Use of a Dense Single Nucleotide Polymorphism Map for In Silico Mapping in the Mouse
Source: PLoS Biol. 2004 Nov 9;2(12):e393. doi: 10.1371/journal.pbio.0020393 (PMC526179; doi:10.1371/journal.pbio.0020393)
Supplement: Table S2 — (34 KB XLS). [file pbio.0020393.st002.xls]

## Sheet: Sheet1
Supplemental Table 2.Total number of SNP alelles between strain pairs
	A/J	AKR/J	BALB/cByJ	BTBR T+ tf/J	BUB/BnJ	C3H/HeJ	C57BL/10J	C57BL/6J	C57BLKS/J	C57BR/cdJ	C57L/J	C58/J	CAST/EiJ	CBA/J	CE/J	CZECHII/EiJ	DBA/1J	DBA/2J	DDK/Pas	FVB/NJ	I/LnJ	JF1/Ms	KK/HlJ	LG/J	LP/J	MA/MyJ	MAI/Pas	MOLF/EiJ	MSM/Ms	NOD/LtJ	NON/LtJ	NZB/BlNJ	NZW/LacJ	PERA/EiJ	PL/J	PWD/Ph	RIIIS/J	SEA/GnJ	SEG/Pas	SJL/J	SM/J	SPRET/EiJ	ST/bJ	SWR/J	WSB/EiJ	ZALENDE/EiJ	129S1/SvImJ	129X1/SvJ
A/J	0	0	0	0	0	0	0	0	0	0	0	0	0	0	0	0	0	0	0	0	0	0	0	0	0	0	0	0	0	0	0	0	0	0	0	0	0	0	0	0	0	0	0	0	0	0	0	0
AKR/J	3196	0	0	0	0	0	0	0	0	0	0	0	0	0	0	0	0	0	0	0	0	0	0	0	0	0	0	0	0	0	0	0	0	0	0	0	0	0	0	0	0	0	0	0	0	0	0	0
BALB/cByJ	2314	3038	0	0	0	0	0	0	0	0	0	0	0	0	0	0	0	0	0	0	0	0	0	0	0	0	0	0	0	0	0	0	0	0	0	0	0	0	0	0	0	0	0	0	0	0	0	0
BTBR T+ tf/J	4479	3599	4165	0	0	0	0	0	0	0	0	0	0	0	0	0	0	0	0	0	0	0	0	0	0	0	0	0	0	0	0	0	0	0	0	0	0	0	0	0	0	0	0	0	0	0	0	0
BUB/BnJ	3561	2705	3471	3665	0	0	0	0	0	0	0	0	0	0	0	0	0	0	0	0	0	0	0	0	0	0	0	0	0	0	0	0	0	0	0	0	0	0	0	0	0	0	0	0	0	0	0	0
C3H/HeJ	2740	3084	2941	4192	3360	0	0	0	0	0	0	0	0	0	0	0	0	0	0	0	0	0	0	0	0	0	0	0	0	0	0	0	0	0	0	0	0	0	0	0	0	0	0	0	0	0	0	0
C57BL/10J	5525	4193	4757	3958	4143	4918	0	0	0	0	0	0	0	0	0	0	0	0	0	0	0	0	0	0	0	0	0	0	0	0	0	0	0	0	0	0	0	0	0	0	0	0	0	0	0	0	0	0
C57BL/6J	5779	4335	4975	4086	4346	5143	406	0	0	0	0	0	0	0	0	0	0	0	0	0	0	0	0	0	0	0	0	0	0	0	0	0	0	0	0	0	0	0	0	0	0	0	0	0	0	0	0	0
C57BLKS/J	5271	3998	4518	4005	3911	4339	1752	1746	0	0	0	0	0	0	0	0	0	0	0	0	0	0	0	0	0	0	0	0	0	0	0	0	0	0	0	0	0	0	0	0	0	0	0	0	0	0	0	0
C57BR/cdJ	5070	3918	4532	3831	3847	4555	1984	2062	2657	0	0	0	0	0	0	0	0	0	0	0	0	0	0	0	0	0	0	0	0	0	0	0	0	0	0	0	0	0	0	0	0	0	0	0	0	0	0	0
C57L/J	5101	3939	4510	3799	3858	4572	1940	1983	2687	471	0	0	0	0	0	0	0	0	0	0	0	0	0	0	0	0	0	0	0	0	0	0	0	0	0	0	0	0	0	0	0	0	0	0	0	0	0	0
C58/J	4977	3673	4444	3780	3722	4484	2150	2317	2828	2196	2141	0	0	0	0	0	0	0	0	0	0	0	0	0	0	0	0	0	0	0	0	0	0	0	0	0	0	0	0	0	0	0	0	0	0	0	0	0
CAST/EiJ	4165	3634	4124	3743	3564	3961	4168	4361	4129	3791	3816	3772	0	0	0	0	0	0	0	0	0	0	0	0	0	0	0	0	0	0	0	0	0	0	0	0	0	0	0	0	0	0	0	0	0	0	0	0
CBA/J	3247	3031	3160	4132	3359	1378	4885	5131	4241	4545	4527	4338	3938	0	0	0	0	0	0	0	0	0	0	0	0	0	0	0	0	0	0	0	0	0	0	0	0	0	0	0	0	0	0	0	0	0	0	0
CE/J	3691	3060	3687	3742	3417	2965	4379	4554	4061	4005	4033	3915	3377	3166	0	0	0	0	0	0	0	0	0	0	0	0	0	0	0	0	0	0	0	0	0	0	0	0	0	0	0	0	0	0	0	0	0	0
CZECHII/EiJ	4435	4027	4479	4150	3985	4186	4527	4718	4411	4103	4126	4092	1176	4232	3712	0	0	0	0	0	0	0	0	0	0	0	0	0	0	0	0	0	0	0	0	0	0	0	0	0	0	0	0	0	0	0	0	0
DBA/1J	4318	3567	3983	4311	3708	3099	5017	5160	3990	4600	4576	4273	3877	2791	3533	4149	0	0	0	0	0	0	0	0	0	0	0	0	0	0	0	0	0	0	0	0	0	0	0	0	0	0	0	0	0	0	0	0
DBA/2J	4627	3772	4360	4619	3945	3267	5391	5576	4150	4814	4851	4536	4101	3074	3742	4388	788	0	0	0	0	0	0	0	0	0	0	0	0	0	0	0	0	0	0	0	0	0	0	0	0	0	0	0	0	0	0	0
DDK/Pas	3934	3282	3658	3736	2941	3591	4081	4185	3971	3701	3694	3561	3483	3470	3358	3911	3738	3898	0	0	0	0	0	0	0	0	0	0	0	0	0	0	0	0	0	0	0	0	0	0	0	0	0	0	0	0	0	0
FVB/NJ	3419	3059	3422	3583	2694	3444	4342	4471	4179	3907	3938	3808	3584	3375	3134	4124	3708	3989	2460	0	0	0	0	0	0	0	0	0	0	0	0	0	0	0	0	0	0	0	0	0	0	0	0	0	0	0	0	0
I/LnJ	3752	3169	3586	3794	3167	3334	4349	4521	4125	3879	3892	3826	3410	3243	3233	3787	3110	3322	3211	3223	0	0	0	0	0	0	0	0	0	0	0	0	0	0	0	0	0	0	0	0	0	0	0	0	0	0	0	0
JF1/Ms	4458	4043	4516	4132	4007	4168	4343	4526	4244	3944	3975	4012	1250	4242	3750	506	4099	4302	3948	4163	3747	0	0	0	0	0	0	0	0	0	0	0	0	0	0	0	0	0	0	0	0	0	0	0	0	0	0	0
KK/HlJ	4282	3430	4019	3701	3220	3804	3947	4119	3776	3609	3645	3460	3387	3739	3473	3722	3573	3894	2532	3185	3149	3624	0	0	0	0	0	0	0	0	0	0	0	0	0	0	0	0	0	0	0	0	0	0	0	0	0	0
LG/J	3214	2462	2911	3792	2807	3198	4087	4328	3971	3922	3952	3769	3666	3306	3190	3995	3807	4015	3142	3170	3215	3967	3385	0	0	0	0	0	0	0	0	0	0	0	0	0	0	0	0	0	0	0	0	0	0	0	0	0
LP/J	4985	3873	4311	2461	4110	4333	4912	5073	4567	4460	4456	4405	3748	4386	3996	3998	4468	4916	3944	4094	4018	3992	3757	4120	0	0	0	0	0	0	0	0	0	0	0	0	0	0	0	0	0	0	0	0	0	0	0	0
MA/MyJ	4021	3204	3628	3697	3130	3623	3825	4065	3818	3640	3637	3440	3636	3544	3457	3963	3704	3996	3119	3020	3394	3958	3236	3261	3945	0	0	0	0	0	0	0	0	0	0	0	0	0	0	0	0	0	0	0	0	0	0	0
MAI/Pas	4236	3854	4288	3982	3845	3981	4363	4498	4214	4022	3968	3939	1187	4005	3559	378	3971	4152	3766	3921	3632	540	3557	3895	3848	3820	0	0	0	0	0	0	0	0	0	0	0	0	0	0	0	0	0	0	0	0	0	0
MOLF/EiJ	4411	3937	4529	4146	3970	4175	4410	4593	4306	4028	4054	4020	1363	4222	3726	969	4060	4281	3740	4020	3724	786	3699	3959	4132	3955	970	0	0	0	0	0	0	0	0	0	0	0	0	0	0	0	0	0	0	0	0	0
MSM/Ms	4442	4056	4514	4108	4053	4253	4388	4549	4302	3972	4010	4063	1228	4297	3768	441	4171	4371	3944	4166	3811	186	3677	4010	3991	4007	484	701	0	0	0	0	0	0	0	0	0	0	0	0	0	0	0	0	0	0	0	0
NOD/LtJ	3524	2885	3418	3695	2822	3538	4290	4433	4107	4038	4051	3868	3689	3546	3417	4127	3772	3888	2957	2572	3289	4145	3306	3077	4033	3221	3931	4097	4202	0	0	0	0	0	0	0	0	0	0	0	0	0	0	0	0	0	0	0
NON/LtJ	3388	2854	3299	3512	2834	3263	4007	4175	3920	3753	3727	3575	3459	3302	3119	3886	3589	3732	2560	2591	3108	3879	2884	3071	3892	3041	3714	3767	3923	2599	0	0	0	0	0	0	0	0	0	0	0	0	0	0	0	0	0	0
NZB/BlNJ	4247	3351	3896	3575	3291	3930	3880	4093	3957	3679	3684	3523	3433	3852	3500	3794	3880	4119	3141	3355	3286	3707	3073	3347	3769	3261	3631	3775	3777	3424	3268	0	0	0	0	0	0	0	0	0	0	0	0	0	0	0	0	0
NZW/LacJ	4255	3491	4112	3676	3358	3940	4020	4129	4010	3685	3733	3520	3425	3838	3598	3789	3970	4144	3086	3283	3264	3699	2933	3352	3761	3291	3676	3693	3741	3415	3234	2537	0	0	0	0	0	0	0	0	0	0	0	0	0	0	0	0
PERA/EiJ	3920	3509	3825	3978	3533	3353	4461	4684	4225	4248	4209	4084	2887	3100	3361	3275	3653	3868	3658	3639	3363	3371	3588	3559	4189	3745	3175	3428	3415	3689	3504	3766	3791	0	0	0	0	0	0	0	0	0	0	0	0	0	0	0
PL/J	3297	2396	3160	3752	2897	3105	4275	4510	3978	4088	4073	3743	3647	3220	3368	4058	3525	3797	3081	3234	3180	4091	3325	2734	4029	3248	3851	4000	4129	3023	2839	3413	3425	3641	0	0	0	0	0	0	0	0	0	0	0	0	0	0
PWD/Ph	4208	3815	4217	3932	3740	3952	4342	4409	4278	3979	3873	3884	1316	3955	3484	597	3965	4164	3683	3840	3581	782	3485	3788	3833	3813	580	1151	700	3937	3717	3577	3599	3066	3798	0	0	0	0	0	0	0	0	0	0	0	0	0
RIIIS/J	3743	3226	3496	3722	2970	3566	4124	4339	3994	3952	3906	3723	3582	3543	3479	3946	3742	4002	2913	2991	3372	3989	3155	3279	4012	2924	3790	3969	4062	3081	2954	3203	3306	3595	3130	3730	0	0	0	0	0	0	0	0	0	0	0	0
SEA/GnJ	3284	3152	2011	3984	3436	3275	4380	4471	4022	4228	4153	3930	3893	3299	3471	4261	3697	3969	3670	3494	3520	4266	3761	3143	4171	3512	4146	4235	4253	3381	3285	3623	3736	3736	3223	4013	3474	0	0	0	0	0	0	0	0	0	0	0
SEG/Pas	3531	3100	3425	3250	3045	3403	3625	3655	3555	3347	3268	3266	1029	3357	2891	1166	3387	3553	3033	3132	3041	1276	2987	3186	3293	3157	1130	1359	1222	3142	3015	2967	3047	2589	3179	1222	3051	3223	0	0	0	0	0	0	0	0	0	0
SJL/J	3707	2989	3427	3689	2614	3591	4188	4364	4044	3903	3987	3769	3634	3595	3415	4116	3835	4089	2767	2097	3377	4151	3415	2866	4065	3233	3917	4083	4196	2875	2875	3443	3308	3672	3108	3844	3280	3600	3152	0	0	0	0	0	0	0	0	0
SM/J	3855	3078	3561	3759	3339	3195	4266	4466	4119	4042	4012	3791	3560	2797	3357	4026	3421	3585	3212	3200	3243	4041	3431	3161	4113	3379	3821	4074	4087	3282	3151	3458	3563	3404	3163	3786	3373	3343	3073	3336	0	0	0	0	0	0	0	0
SPRET/EiJ	3717	3201	3615	3453	3241	3536	3704	3866	3675	3407	3410	3408	1039	3522	3028	1177	3499	3694	3156	3295	3151	1295	3098	3264	3450	3304	1185	1394	1230	3323	3138	3138	3192	2718	3340	1300	3223	3446	161	3303	3223	0	0	0	0	0	0	0
ST/bJ	3574	2989	3430	3758	2936	3308	4107	4289	3887	3948	3880	3679	3555	3234	3274	3931	3654	3861	2700	2702	3125	4008	3251	3024	4062	2981	3738	3894	3998	3130	2912	3299	3316	3488	2849	3704	3033	3471	3092	2957	3238	3167	0	0	0	0	0	0
SWR/J	3838	3080	3552	3548	2588	3504	4144	4277	4028	3853	3854	3593	3469	3383	3292	3990	3797	4018	2303	1615	3266	4063	3185	3139	3979	3051	3789	3914	4104	2473	2537	3308	3234	3463	3153	3737	2922	3421	3025	1982	3148	3165	2696	0	0	0	0	0
WSB/EiJ	4268	3466	4010	3891	3387	4033	4144	4240	4053	3871	3854	3730	2538	3922	3221	3048	3982	4224	3392	3368	3521	3198	3551	3497	3999	3568	2916	3223	3177	3553	3251	3432	3517	3031	3604	2901	3461	3772	2305	3492	3392	2426	3371	3312	0	0	0	0
ZALENDE/EiJ	4231	3543	4013	3724	3469	3969	4181	4316	4080	3914	3866	3751	2258	3878	3219	2679	3990	4152	3417	3405	3488	2890	3587	3622	3792	3634	2612	2921	2833	3612	3427	3565	3585	2684	3574	2629	3530	3851	2093	3539	3437	2142	3540	3269	2294	0	0	0
129S1/SvImJ	5394	4273	4836	3104	4270	4715	5197	5358	4912	4709	4702	4632	3801	4705	4229	4081	4879	5367	4001	4220	4339	4055	3881	4281	1370	4237	3908	4137	4046	4264	4117	3936	3737	4319	4288	3848	4147	4476	3338	4196	4322	3499	4220	4046	4137	3909	0	0
129X1/SvJ	5338	4530	4614	3515	4547	4849	5256	5418	5121	4844	4744	4713	3981	4831	4406	4171	5284	5705	4274	4436	4504	4144	4126	4293	2018	4368	4043	4233	4151	4440	4381	4209	3888	4478	4560	4001	4252	4556	3522	4403	4579	3650	4475	4314	4330	4182	950	0
